# Supplementary material
Source: HighWire-hosted journal article supplement (https://erj.ersjournals.com/content/57/4/2003104)
Supplement: inline-supplementary-material-1 [file inline-supplementary-material-1.pdf]

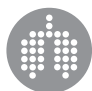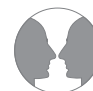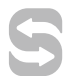

SHAREABLE PDF

# Free-breathing MRI for monitoring ventilation changes following antibiotic treatment of pulmonary exacerbations in paediatric cystic fibrosis

Samal Munidasa<sup>1,2</sup>, Marcus J. Couch<sup>1,2</sup>, Jonathan H. Rayment <sup>3</sup>,  
Andreas Voskrebenzev<sup>4,5</sup>, Ravi Seethamraju <sup>6</sup>, Jens Vogel-Claussen<sup>4,5</sup>,  
Felix Ratjen<sup>1,7</sup> and Giles Santyr<sup>1,2</sup>

**Affiliations:** <sup>1</sup>Translational Medicine Program, The Hospital for Sick Children, Toronto, ON, Canada. <sup>2</sup>Department of Medical Biophysics, University of Toronto, Toronto, ON, Canada. <sup>3</sup>Division of Respiratory Medicine, British Columbia Children's Hospital, Vancouver, BC, Canada. <sup>4</sup>Diagnostic and Interventional Radiology, Hannover Medical School, Hannover, Germany. <sup>5</sup>Biomedical Research in Endstage and Obstructive Lung Disease Hannover (BREATH), Member of the German Center for Lung Research (DZL), Hannover, Germany. <sup>6</sup>MR Collaborations North East, Siemens Medical Solutions, Boston, MA, USA. <sup>7</sup>Division of Respiratory Medicine, The Hospital for Sick Children, Toronto, ON, Canada.

**Correspondence:** Giles Santyr, Hospital for Sick Children, Peter Gilgan Centre for Research and Learning, 686 Bay Street, Room 08-9712, Toronto, ON M5G 0A4, Canada. E-mail: giles.santyr@sickkids.ca

The work was carried out using REB and Health Canada-approved protocols at the Hospital for Sick Children (clinicaltrials.gov: NCT02740868, for PEX participants, and NCT02606487, for healthy volunteers). Individual participant data will not be shared.

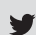

@ERSpublications

**Ventilation distributions obtained with PREFUL MRI correlated with Xe-MRI, and both could detect improvements following treatment of a PEX. PREFUL MRI offers an effective and more widely available alternative to Xe-MRI for monitoring treatment.** <https://bit.ly/3le0TT9>

**Cite this article as:** Munidasa S, Couch MJ, Rayment JH, *et al.* Free-breathing MRI for monitoring ventilation changes following antibiotic treatment of pulmonary exacerbations in paediatric cystic fibrosis. *Eur Respir J* 2021; 57: 2003104 [<https://doi.org/10.1183/13993003.03104-2020>].

This single-page version can be shared freely online.

## To the Editor:

Treatment response in cystic fibrosis (CF) is traditionally monitored using pulmonary function tests (PFTs), such as spirometry. However, PFTs can be insensitive to treatment, particularly in early CF lung disease [1]. Hyperpolarised xenon-129 magnetic resonance imaging (Xe-MRI) has been shown to be feasible in children [2], more sensitive to early CF lung disease compared to PFTs [3] and captures improvements in ventilation inhomogeneity in paediatric CF patients receiving intravenous antibiotic treatment for a pulmonary exacerbation [4]. However, access to hyperpolarised <sup>129</sup>Xe gas is not widely available, and Xe-MRI requires subjects to perform an extended breath-hold (10–15 s), which is challenging for very sick children.
